# Supplementary material
Source: PubMed Central journal article supplement (PMC2990206)
Supplement: supp_dev.052506_DEV052506-TableS1.pdf [file supp_dev.052506_DEV052506-TableS1.pdf]

**Table S1. Primers used**

| Gene            | Primer    | Sequence 5'-3'           |
|-----------------|-----------|--------------------------|
| <i>upd1</i>     | Upd1-F    | cctactcgtcctgctccttg     |
|                 | Upd1-R    | tgcgatagtcgatccagttg     |
| <i>upd2</i>     | Upd2-F    | catcgtcatcctcatcatcg     |
|                 | Upd2-R    | atgttccgcaagttttcgag     |
| <i>upd3</i>     | Upd3-F    | aaattcgacaaagtcgcctg     |
|                 | Upd3-R    | ttccactggattcctggttc     |
| <i>diap1</i>    | Diap1-F   | gaaaaagagaaaagccgtaagt   |
|                 | Diap1-R   | tgtttgcctgactcttaatttctc |
| <i>expanded</i> | Ex-F      | gatgctggacaccgaactct     |
|                 | Ex-R      | cttgctctcgggatctgc       |
| <i>socs36E</i>  | Socs36E-F | acgcaacacagcagcaag       |
|                 | Socs36E-R | ggacacggatgtggatgc       |
| <i>rp49</i>     | Rp49-F    | cggatcgatattgctaagctgt   |
|                 | Rp49-R    | cgacgcactctgttgctg       |
| <i>dp</i>       | Dp-F      | ccgcaaattcgacagagac      |
|                 | Dp-R      | cgcaacatttcgttttctg      |
| <i>myosin1A</i> | Myo1A-F   | gaagctggagtgaggactt      |
|                 | Myo1A-R   | gatggatccgttttggaatc     |
| <i>yorkie</i>   | Yki-F     | gcgccttgccgccgggatg      |
|                 | Yki-R     | gctggcgatattggattctg     |
| <i>puckered</i> | Puc-F     | gccacatcagaacatcaagc     |
|                 | Puc-R     | ccgttttccgtgcatctt       |
| <i>GFP</i>      | GFP-F     | tctatatcatggccgacaagc    |
|                 | GFP-R     | gttgtggcggatcttgaagt     |
| <i>cyclinE</i>  | CycE-F    | acaatttggcctgggacta      |
|                 | CycE-R    | ggccataagcattcgtca       |
